# Supplementary material
Source: PubMed Central journal article supplement (PMC2575811)
Supplement: NIHMS24176-supplement-01.pdf [file NIHMS24176-supplement-01.pdf]

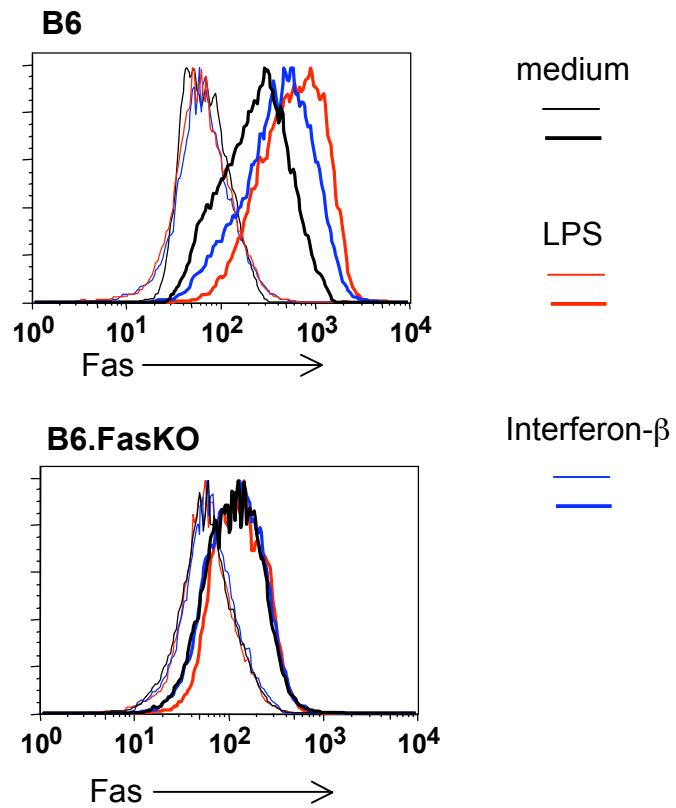

Supplemental Figure 1.

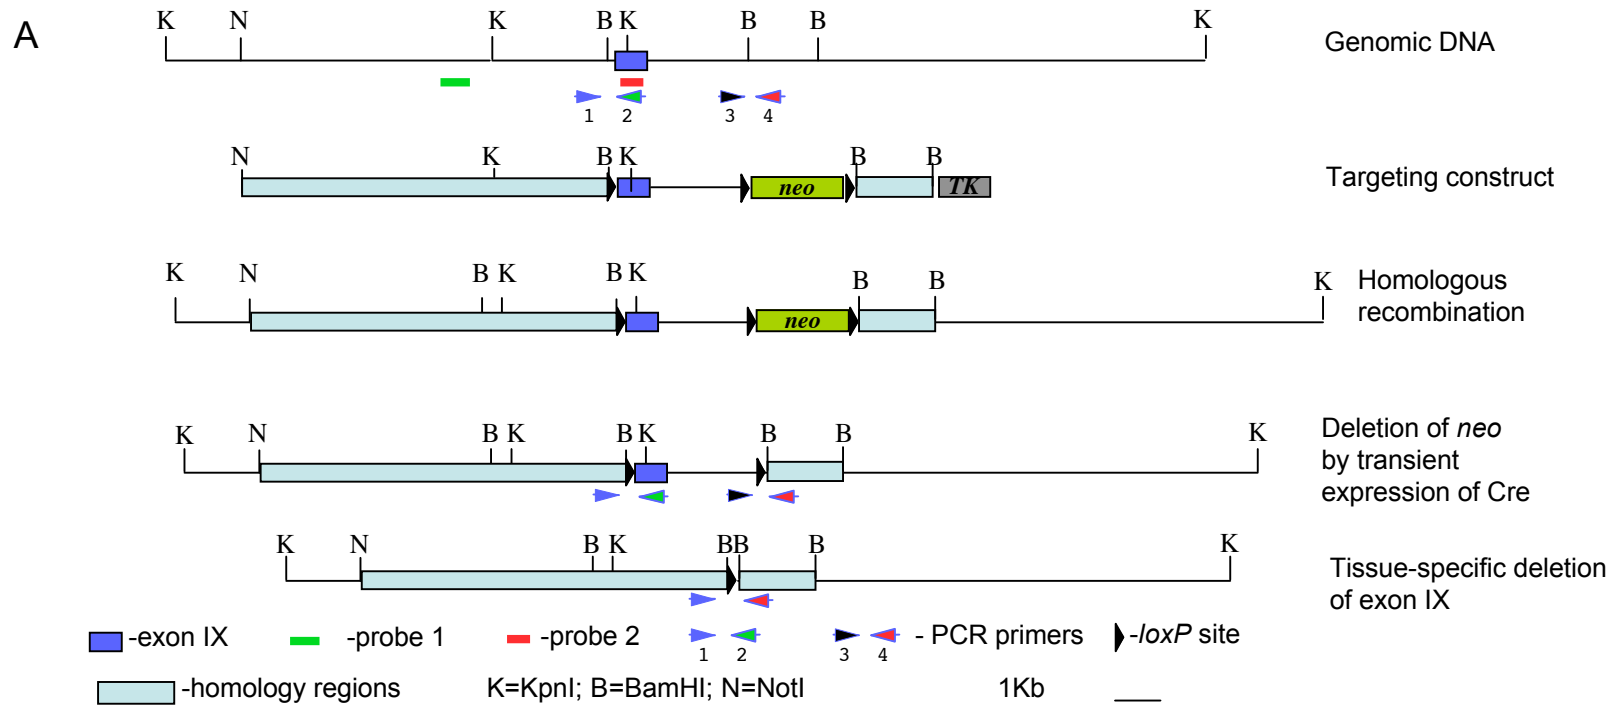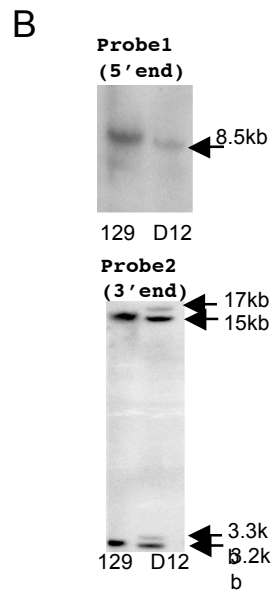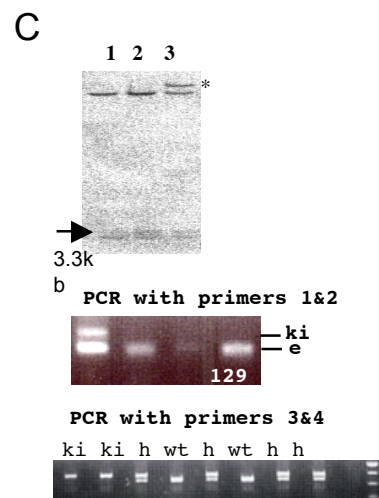

Supplemental Figure 2.

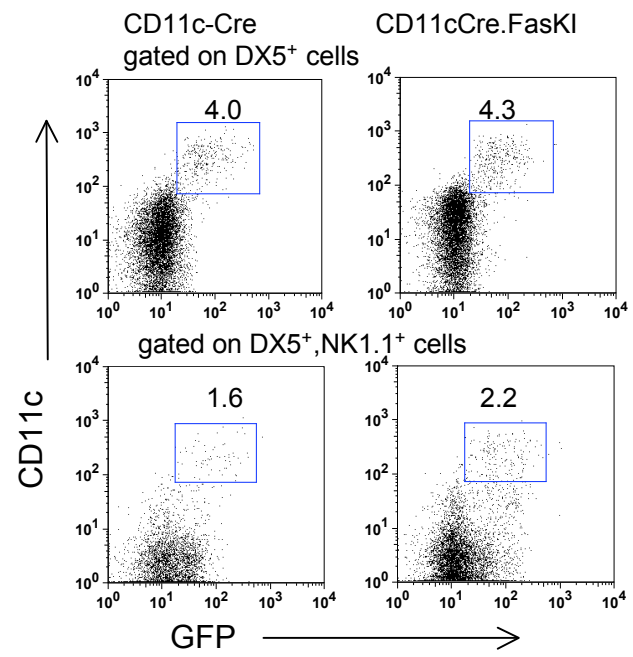

Supplemental Figure 3

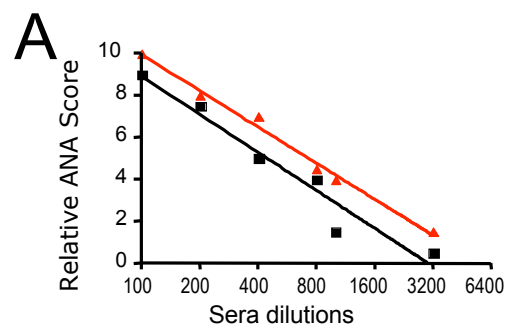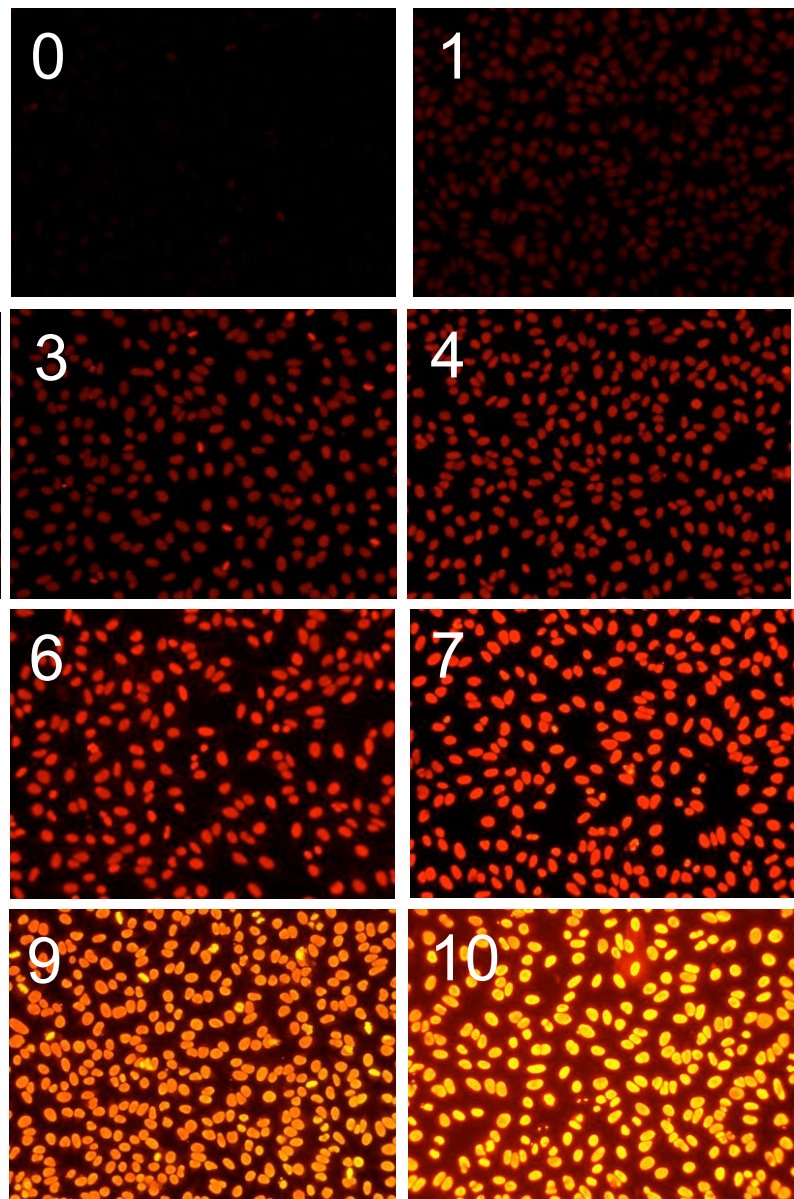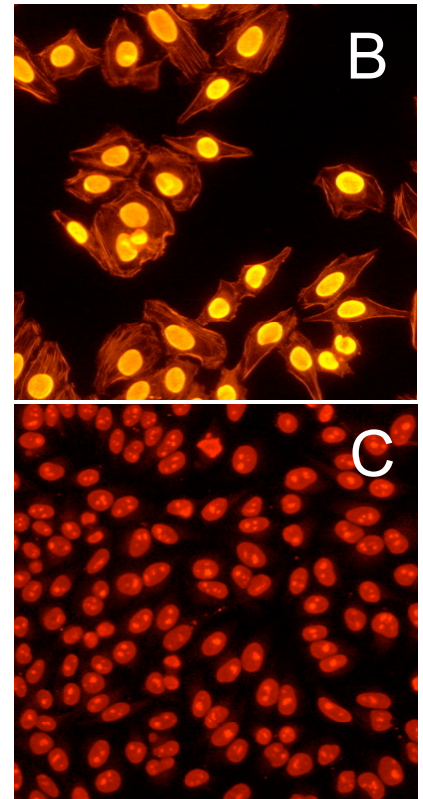

Supplemental Figure 4

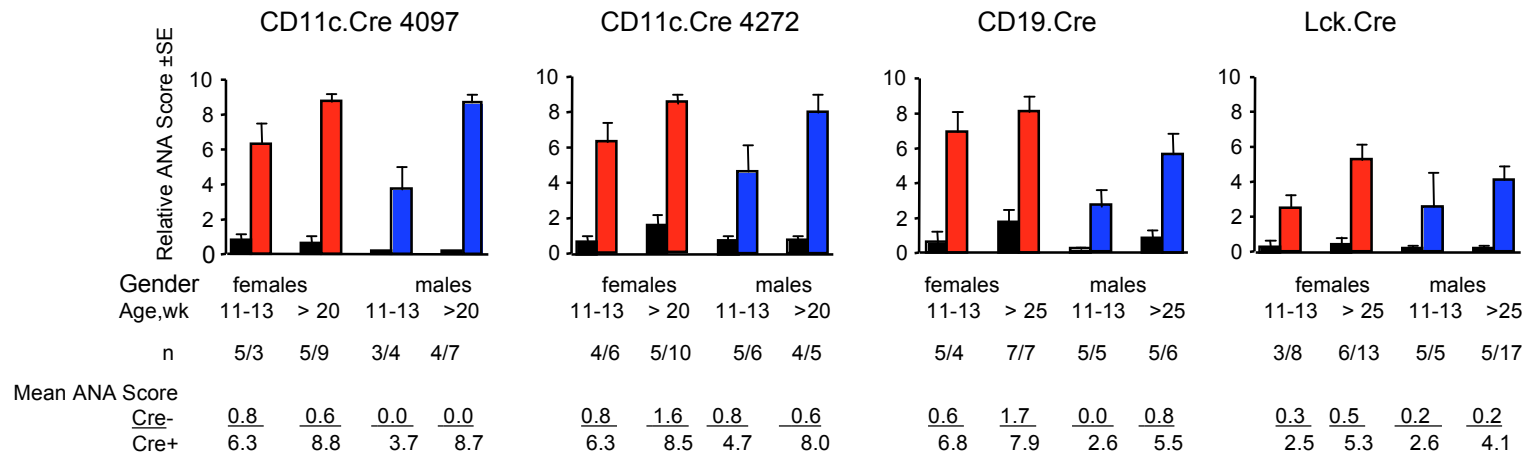

Supplemental Figure 5.

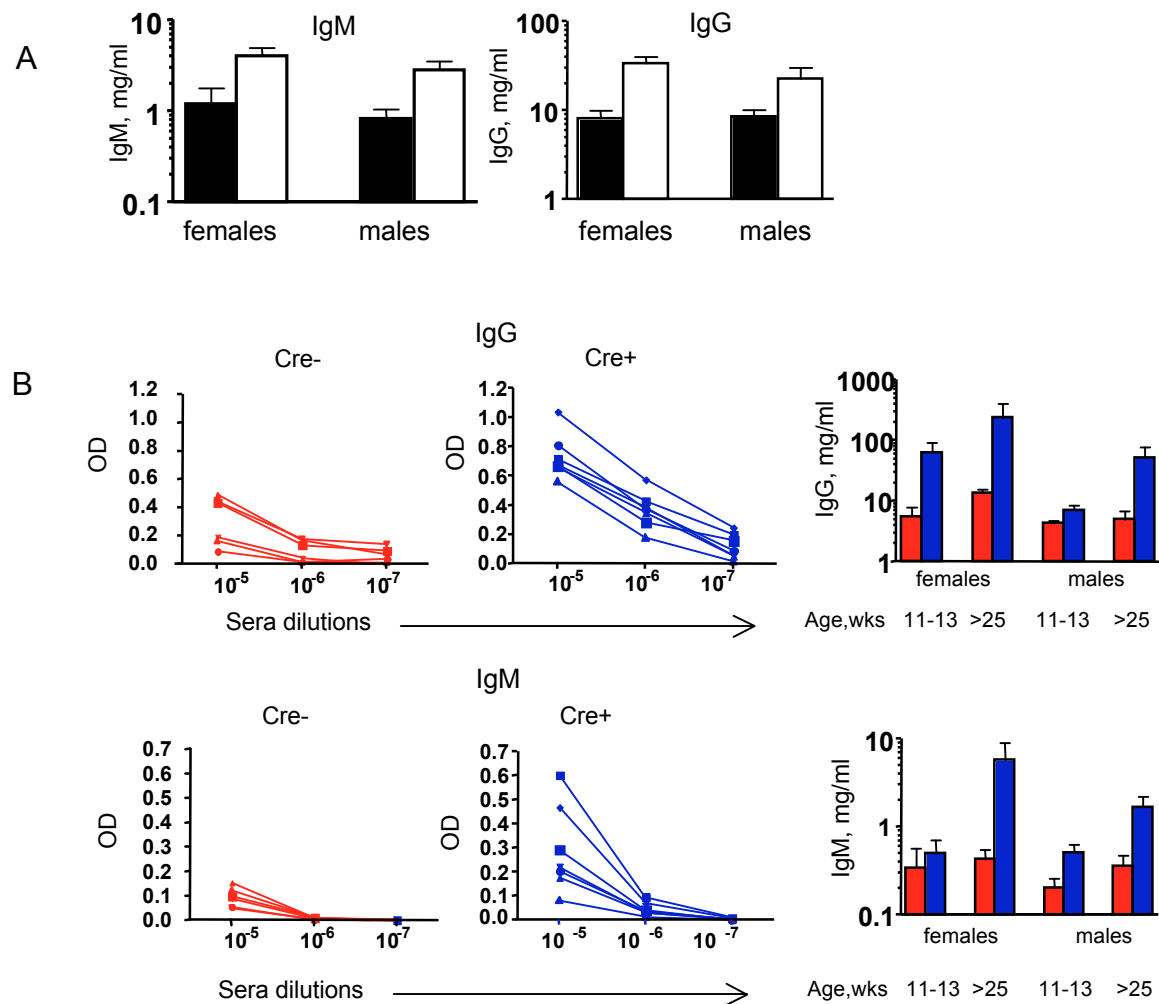

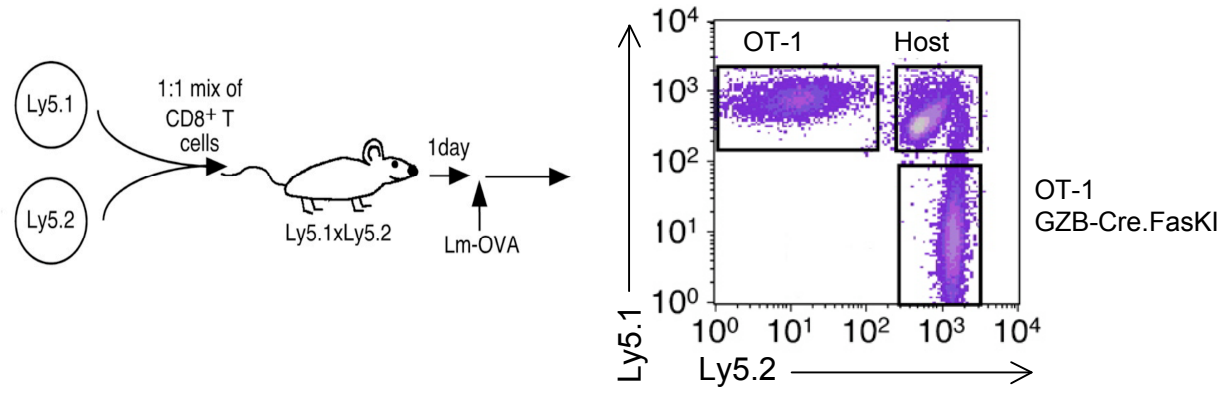

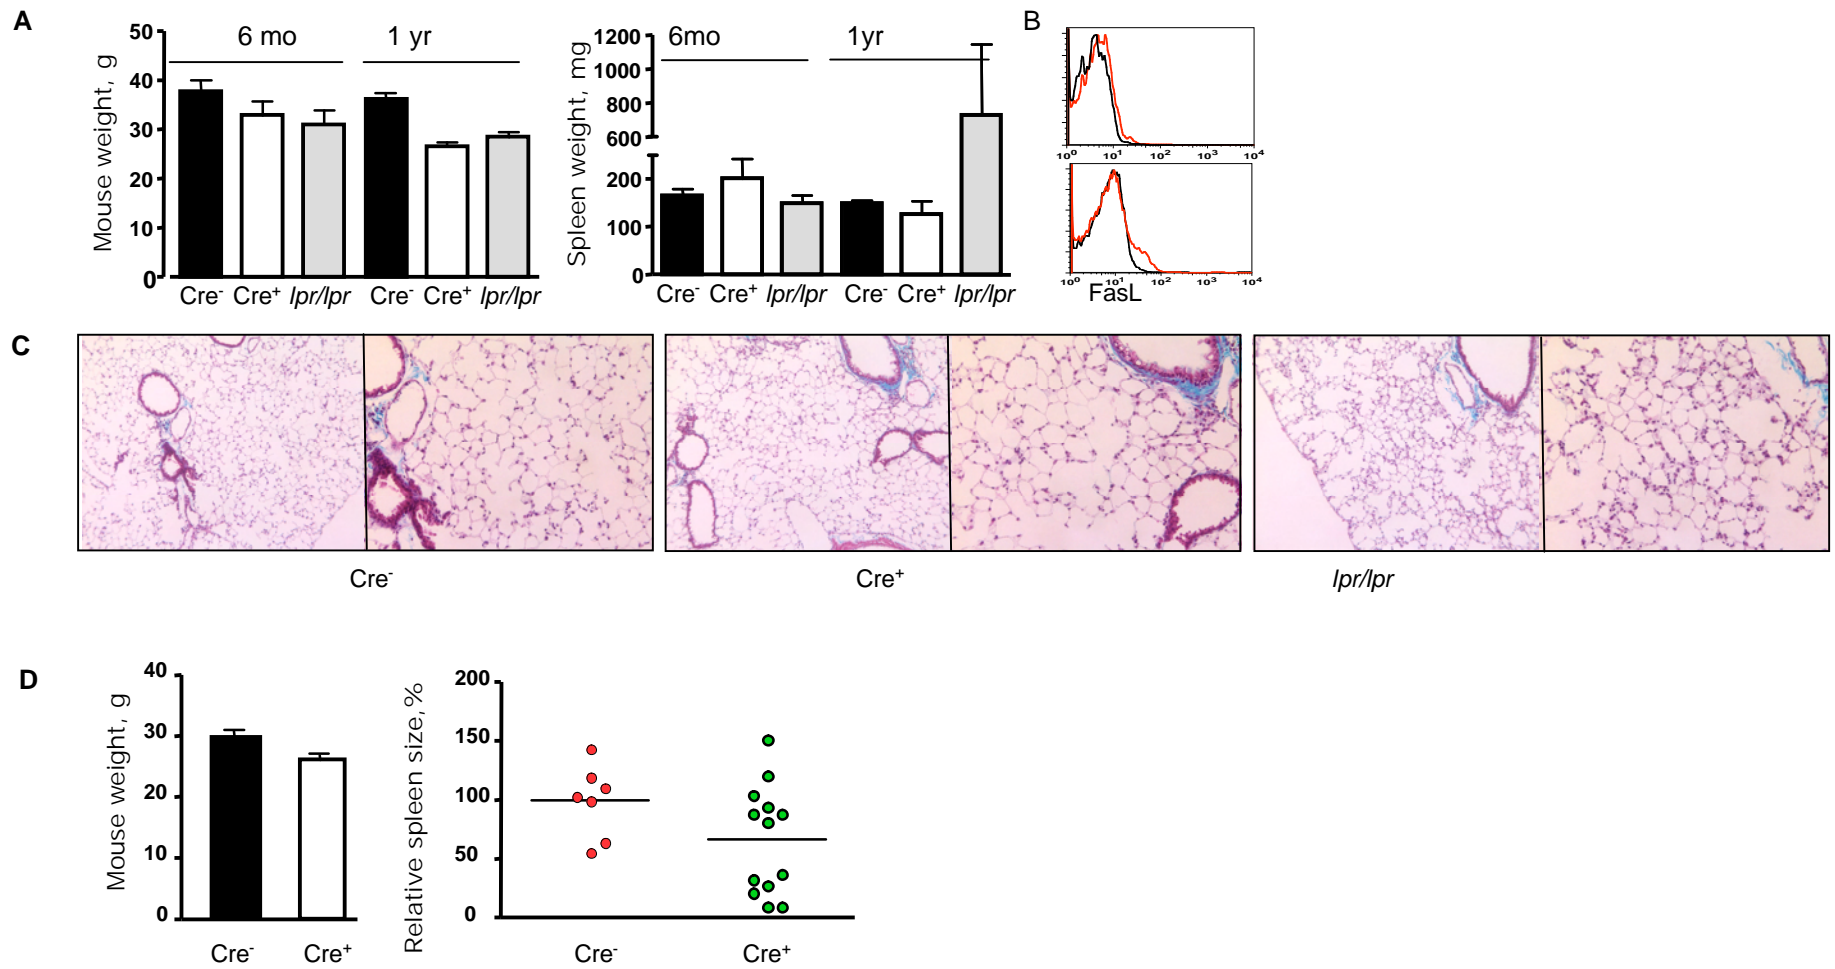

Supplemental Figure 8
